# Supplementary figures and images for: Optical fibre long-period grating sensors modified with antifouling bio-functional nano-brushes
Source: Royal Society of Chemistry journal article supplement (doi:10.1039/d4bm01447b), 2024-12-12

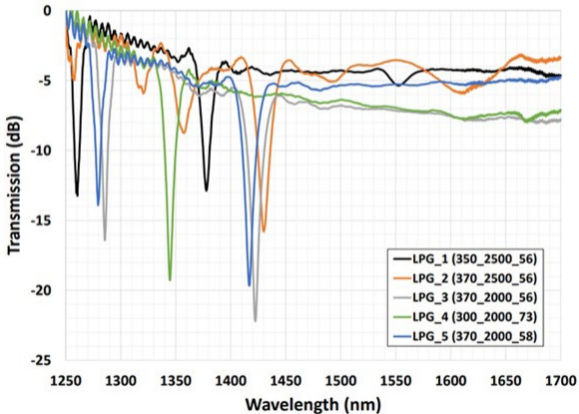

Supplement: d4bm01447b2.pdf [file d4bm01447b2.pdf]

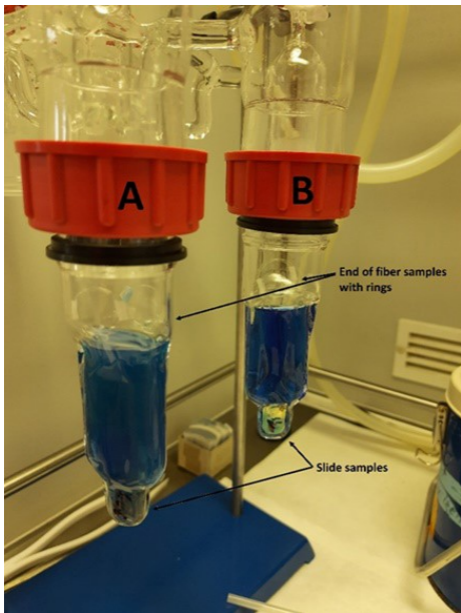

Supplement: d4bm01447b3.pdf [file d4bm01447b3.pdf]

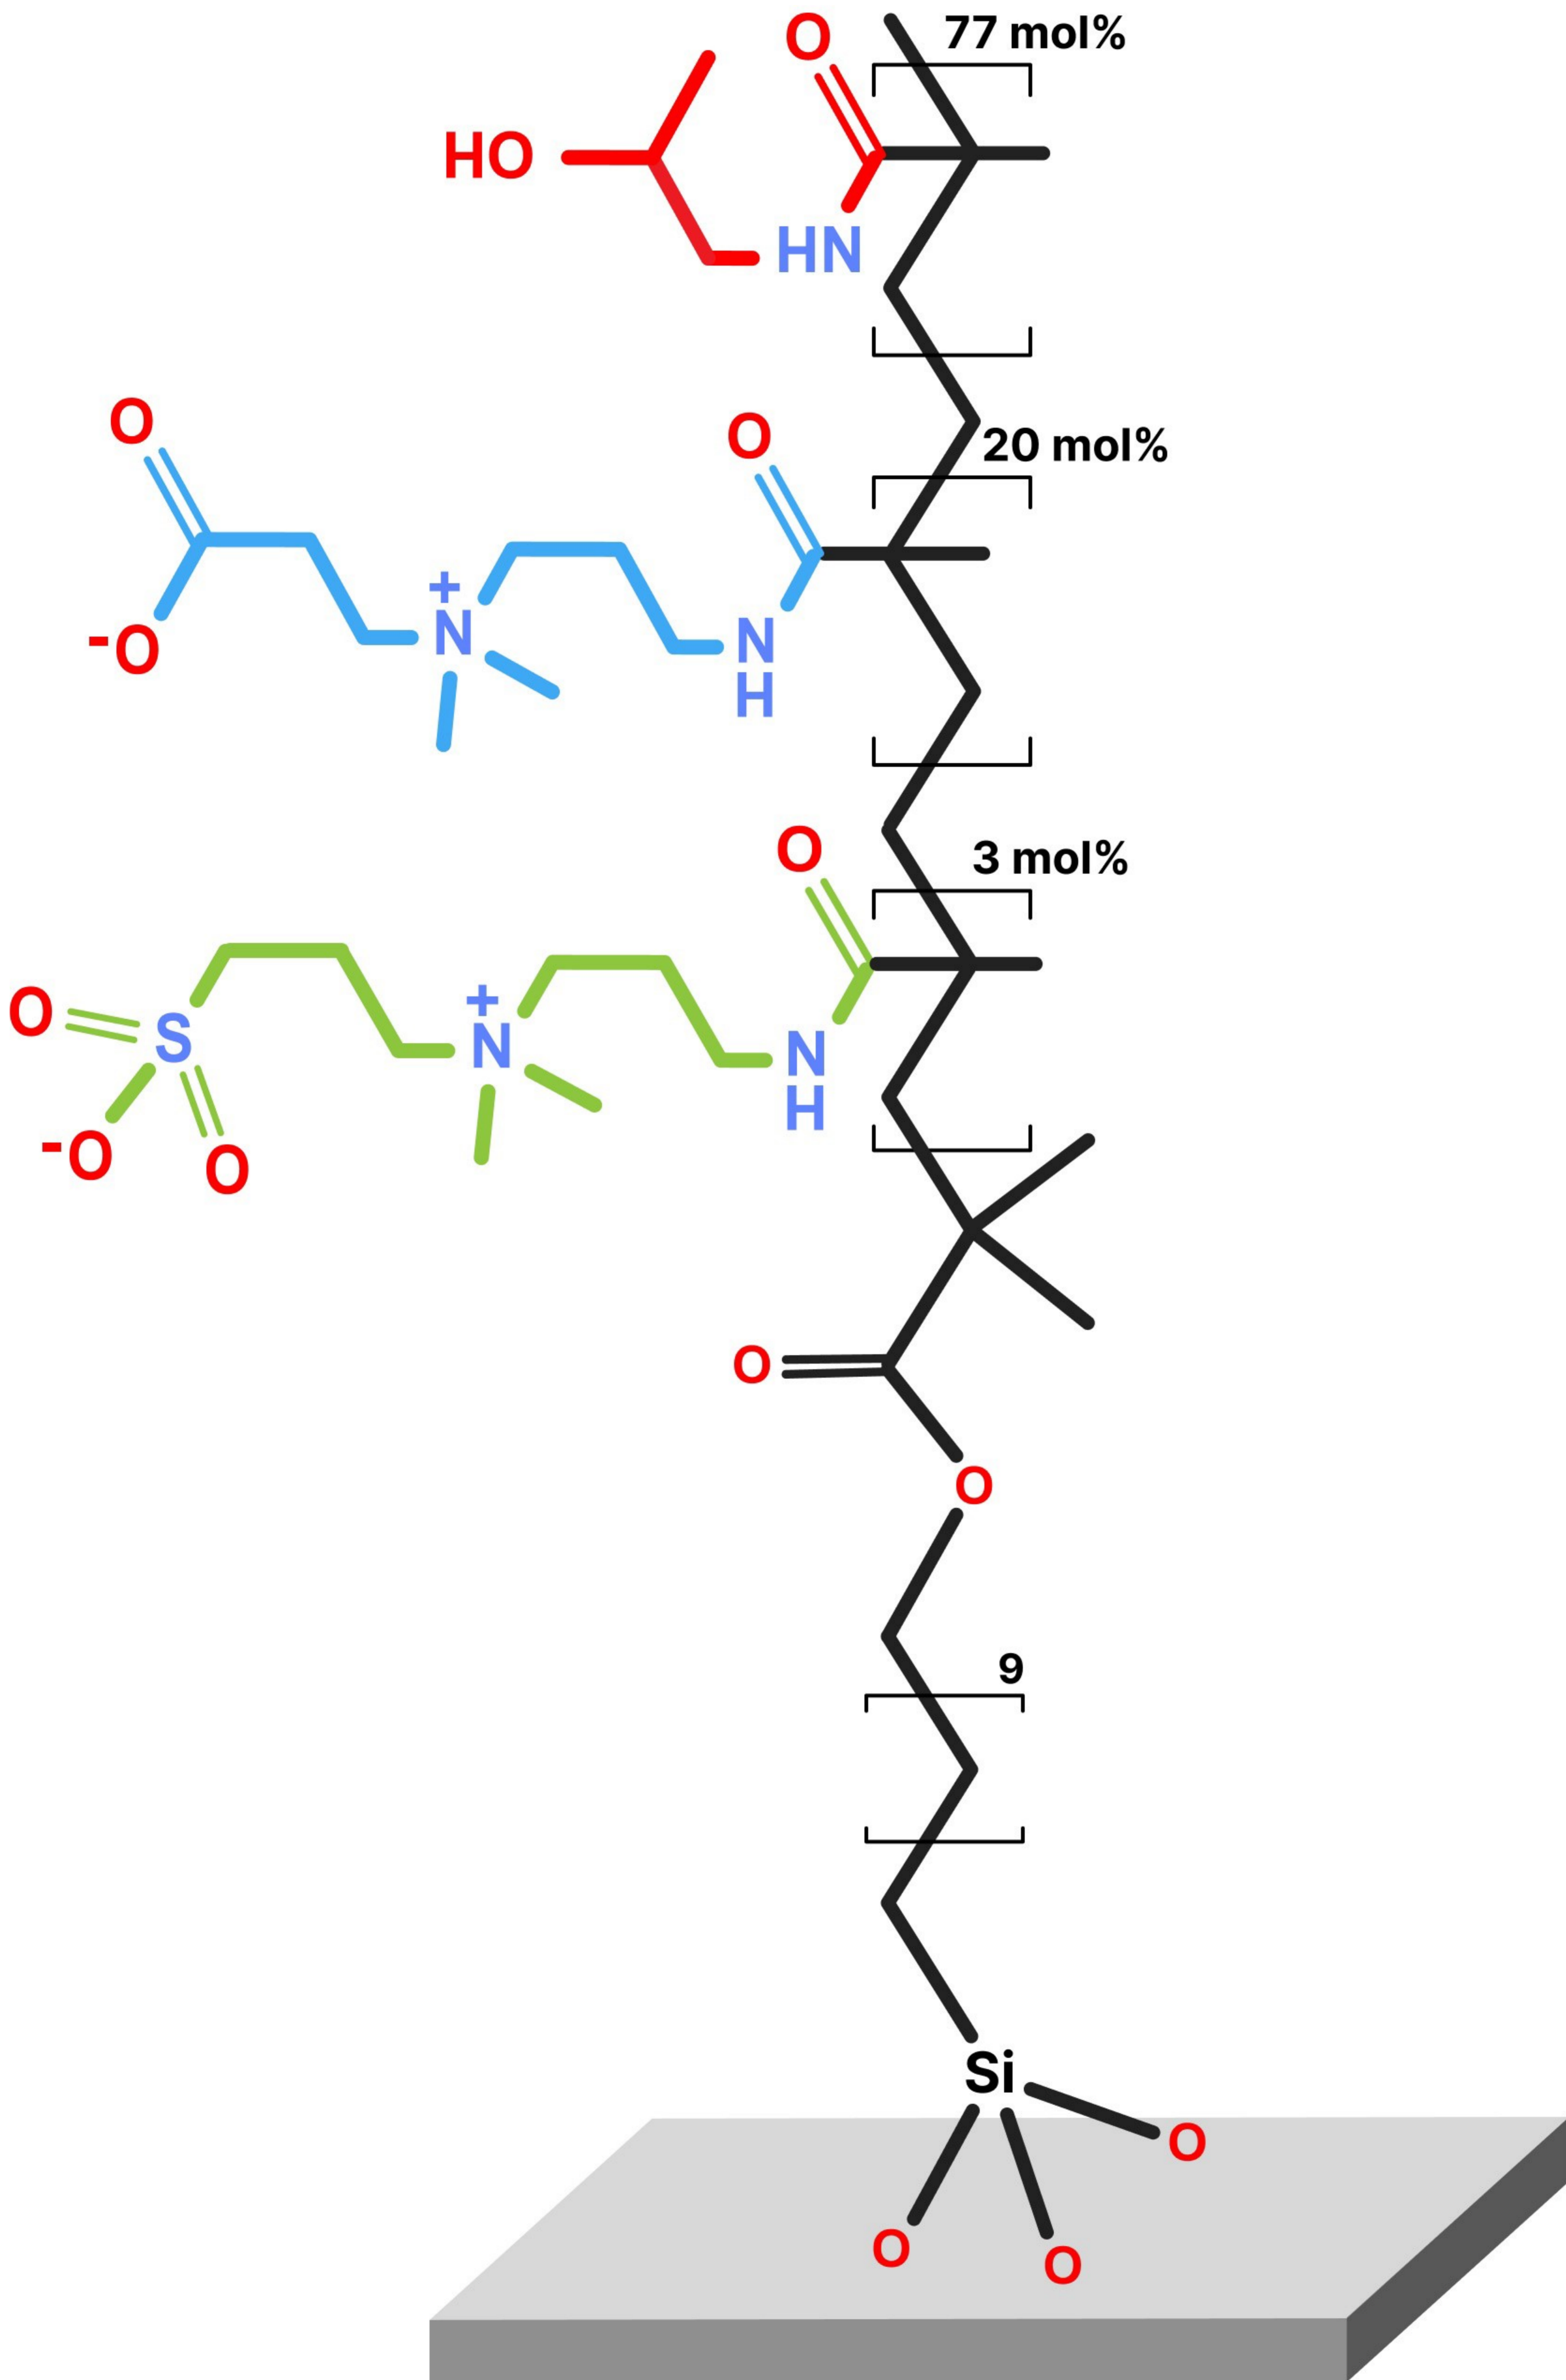

Supplement: d4bm01447b4.pdf [file d4bm01447b4.pdf]

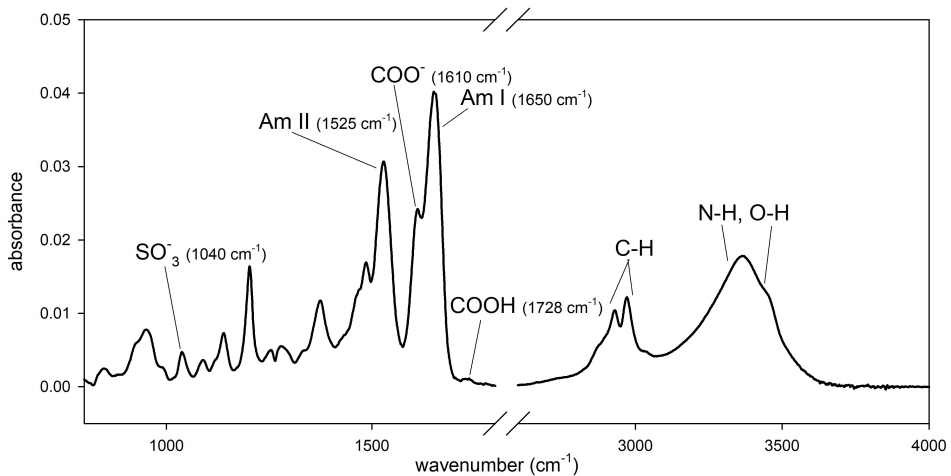

Supplement: d4bm01447b5.pdf [file d4bm01447b5.pdf]

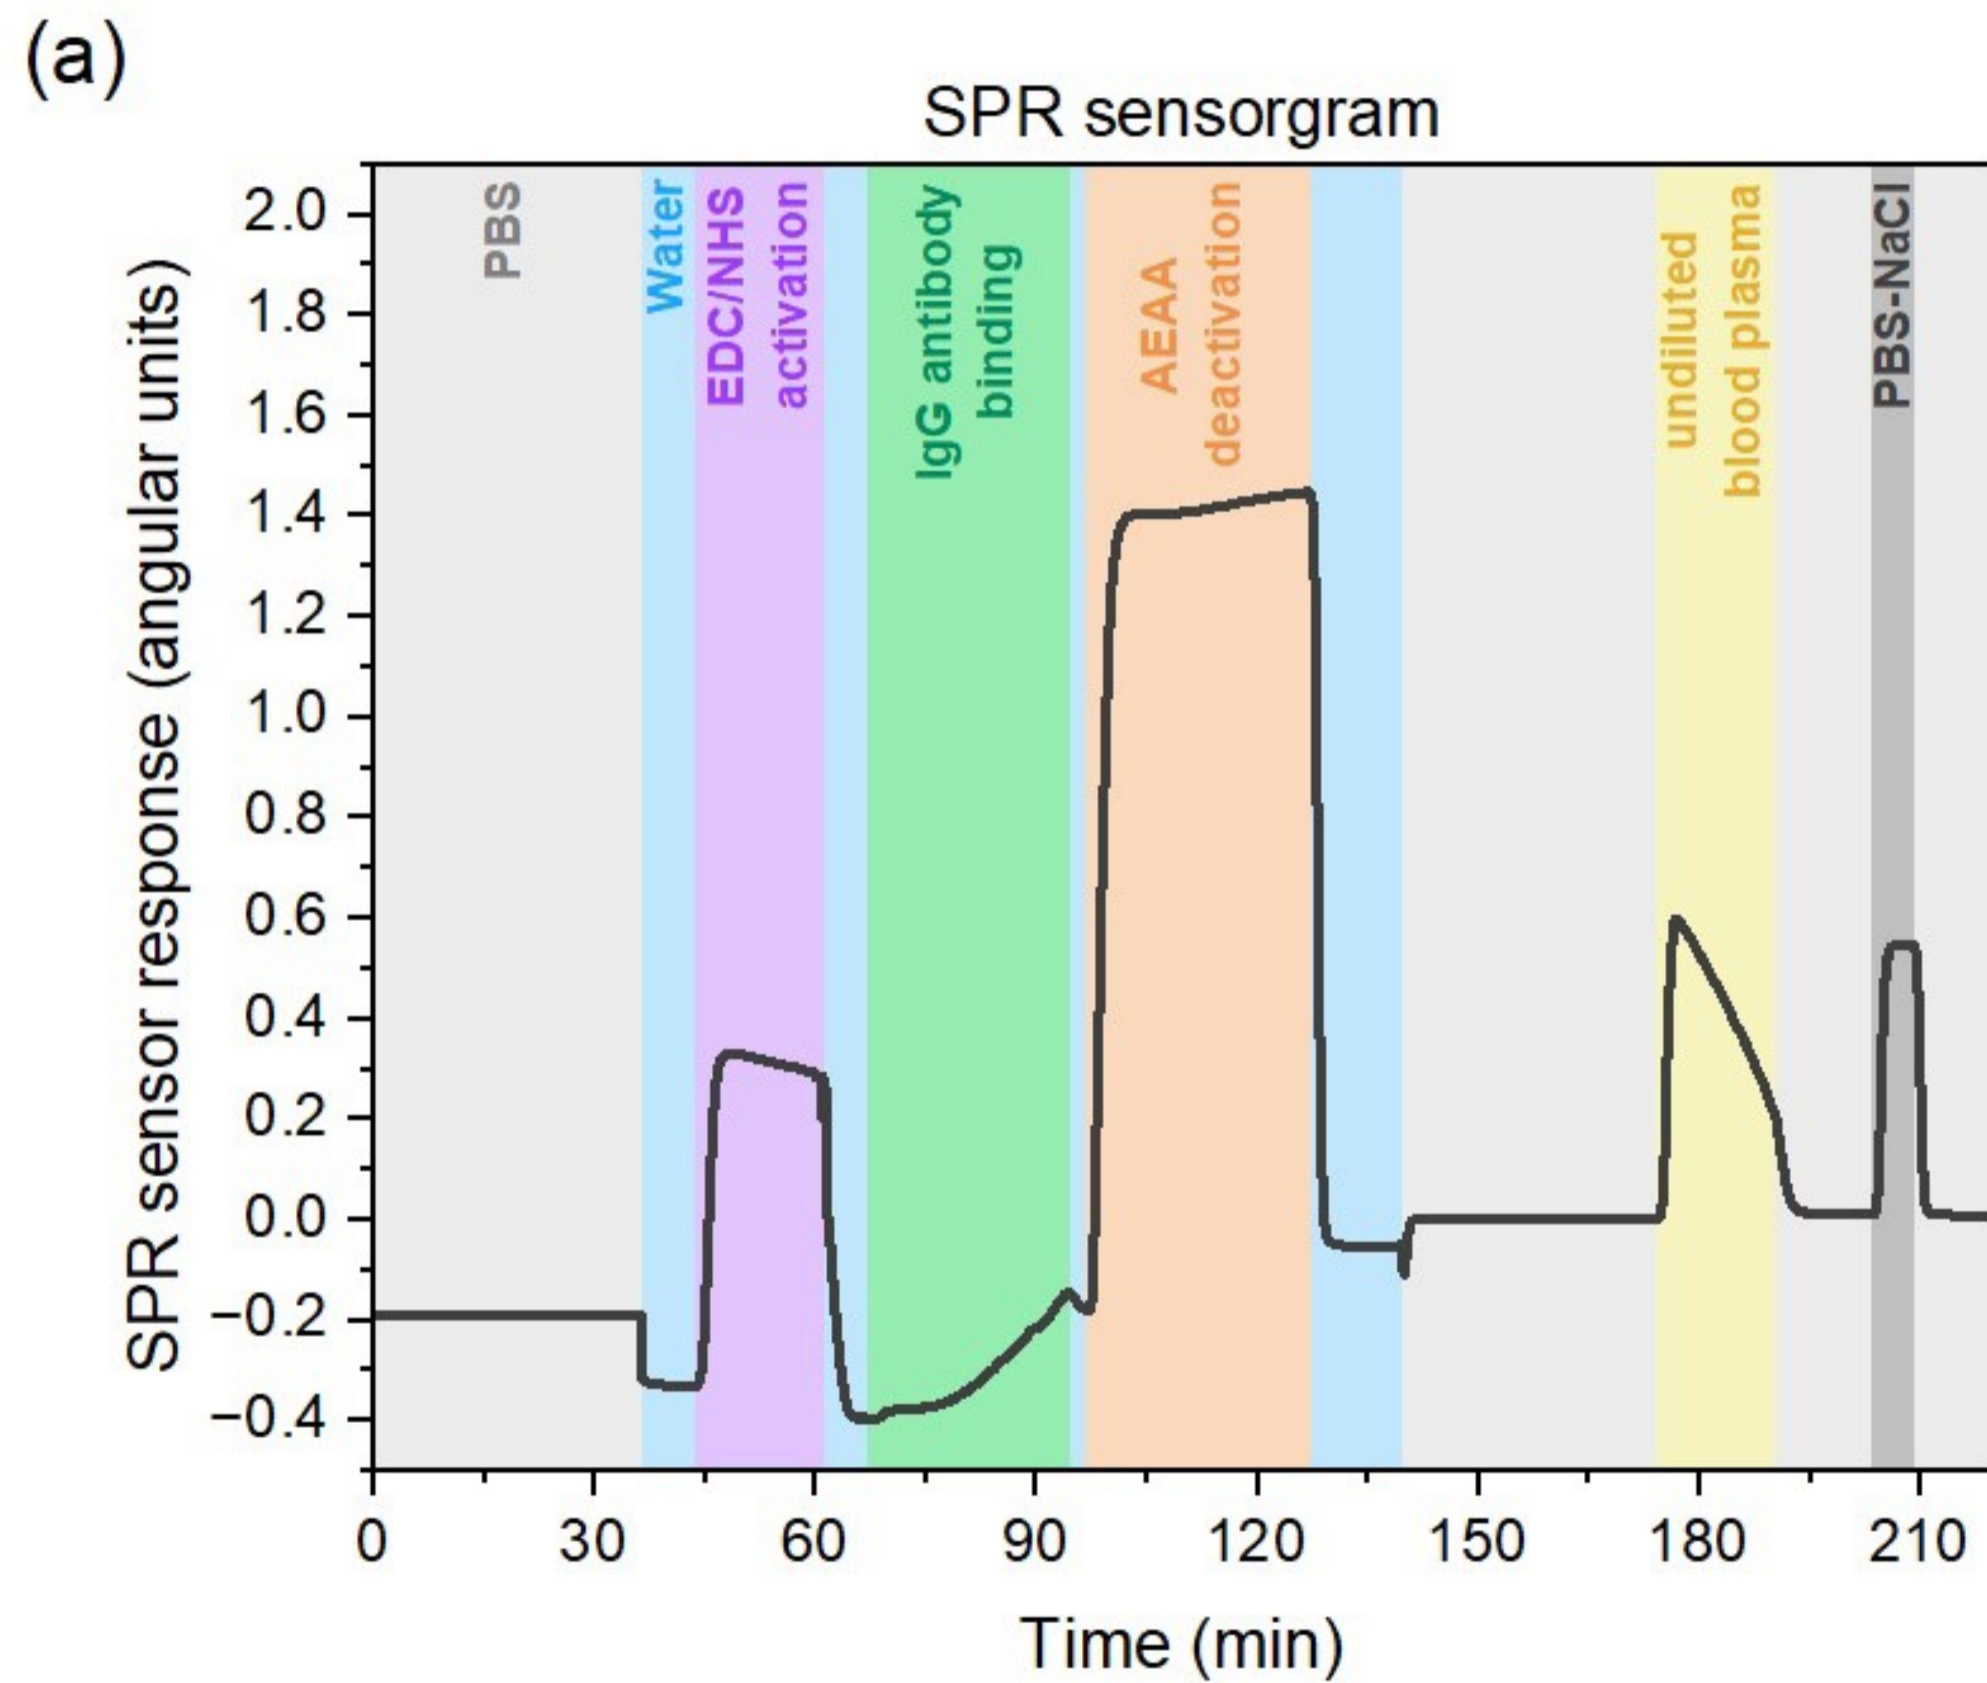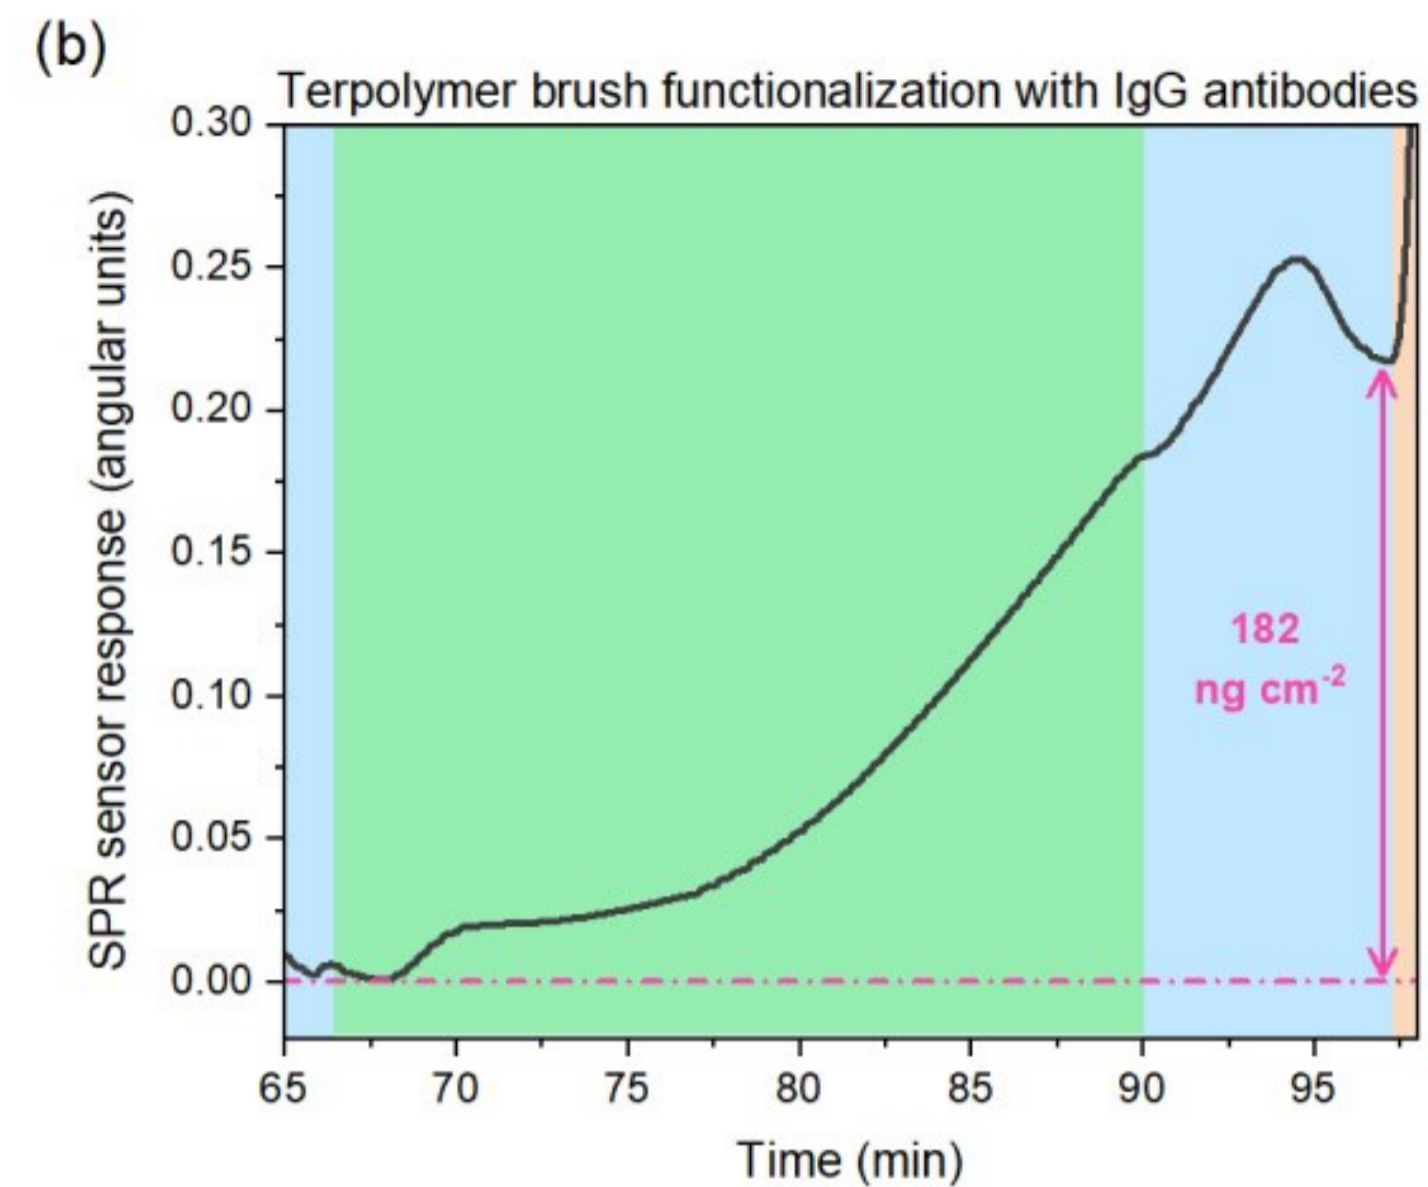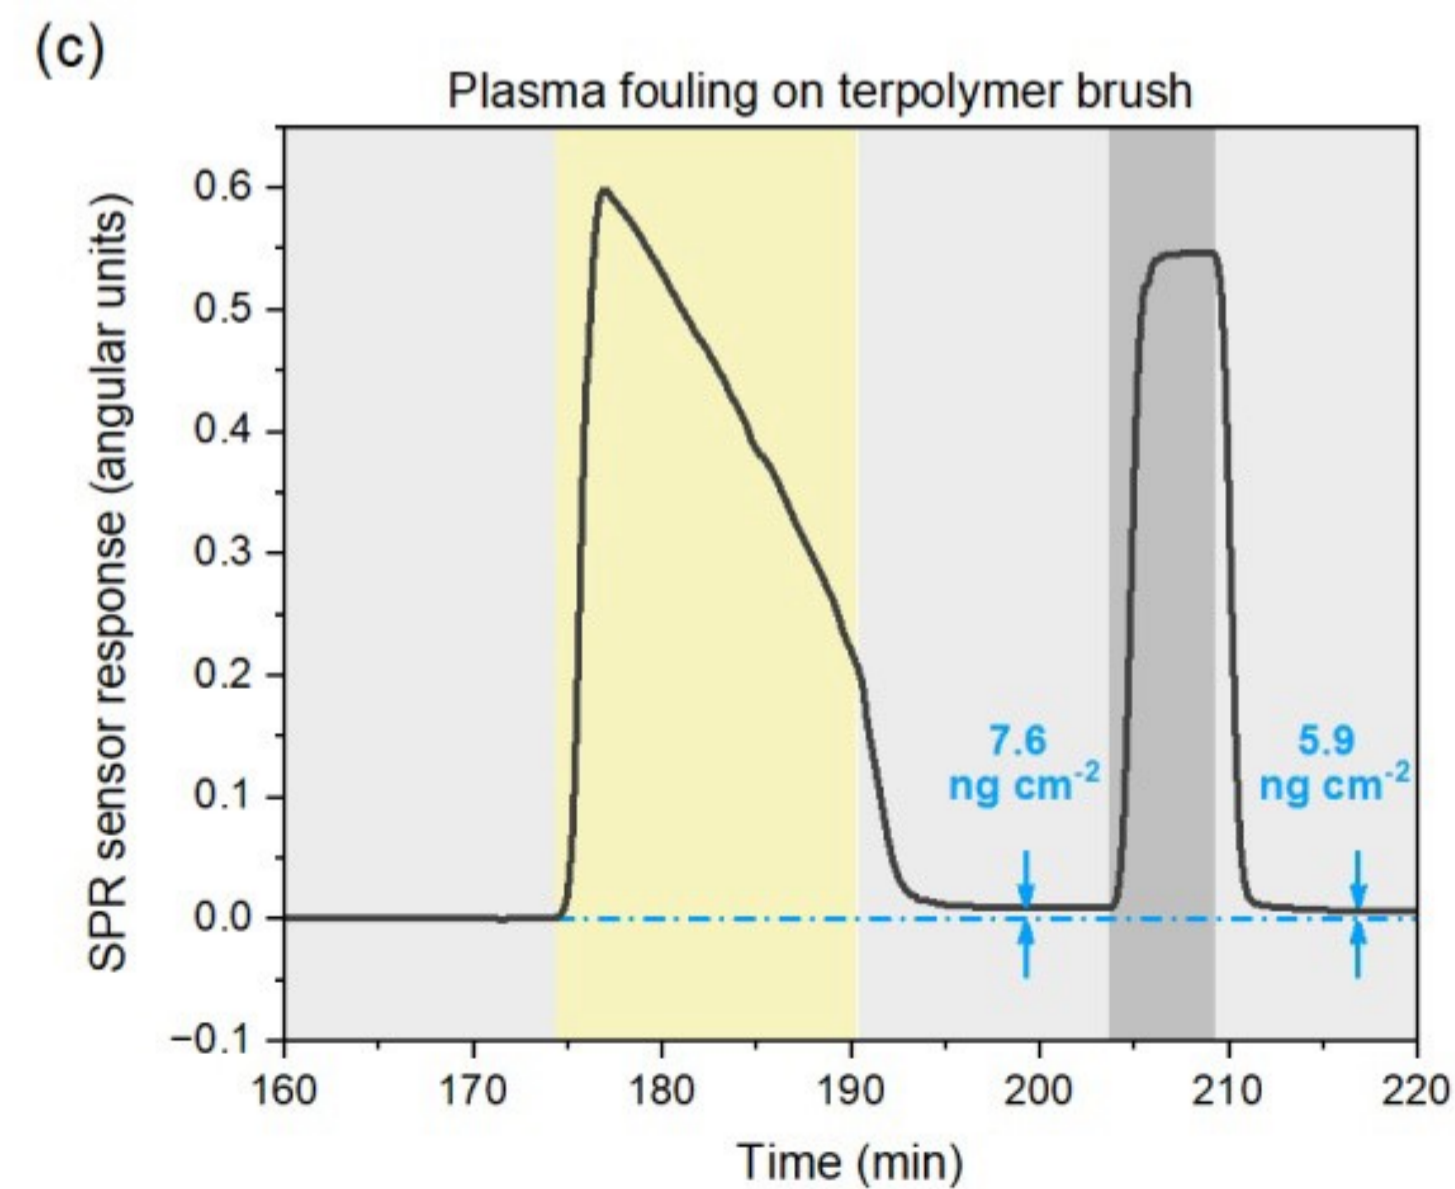

Supplement: d4bm01447b6.pdf [file d4bm01447b6.pdf]
